# Supplementary material for: Strategies to engineer articular cartilage with biomimetic zonal features: a review
Source: Royal Society of Chemistry journal article supplement (doi:10.1039/d4bm00579a), 2024-01-01
Supplement: d4bm00579a1.pdf [file d4bm00579a1.pdf]

# Strategies to Engineer Articular Cartilage with Biomimetic

## Zonal Features: A Review

### Authors

Ângela Semitela\*, Paula A.A.P. Marques and António Completo\*

### Affiliations

Centre of Mechanical Technology and Automation (TEMA), Department of Mechanical Engineering, University of Aveiro, 3810-193 Aveiro, Portugal

Intelligent Systems Associate Laboratory (LASI), Portugal

## Supporting Information

**Table S1.** Strategies exploring zonal chondrocyte and MSCs-based phenotypes.

| Ref.                      | Study goal                                                                                             | Zonal features | Matrix                                      | Fabrication          | Cells (origin)         | <i>In vitro</i>                  | <i>In vivo</i> |
|---------------------------|--------------------------------------------------------------------------------------------------------|----------------|---------------------------------------------|----------------------|------------------------|----------------------------------|----------------|
| <i>Zonal chondrocytes</i> |                                                                                                        |                |                                             |                      |                        |                                  |                |
| 65,256                    | Morphological and ECM synthesis differences between ZC                                                 | ZC             | AGA                                         | TIC                  | Chondrocytes (bovine)  | 12 days                          | –              |
| 259                       | Cytoskeletal organisation differences between ZC in AGA and TCPS                                       | ZC             | TCPS                                        | –                    | Chondrocytes (bovine)  | 3 weeks                          | –              |
|                           |                                                                                                        |                | AGA                                         | TIC                  |                        |                                  |                |
| 263                       | Quantification of SZP of ZC on monolayer, cartilage explants or decellularized cartilage substrate     | ZC             | TCPS                                        | –                    | Chondrocytes (bovine)  | 9 days                           | –              |
|                           |                                                                                                        |                | Cartilage explants                          |                      |                        |                                  |                |
|                           |                                                                                                        |                | Decellularized cartilage substrate          |                      |                        |                                  |                |
| 176,177                   | Culture environments that maintain ZCs phenotype                                                       | ZC             | AGA                                         | TIC                  | Chondrocytes (goat)    | 2 weeks                          | –              |
|                           |                                                                                                        |                | COL II and AGC-coated surfaces              | Solvent casting      |                        |                                  |                |
| 265                       | Fabrication of self-assembled constructs with different ZC                                             | ZC             | –                                           | –                    | Chondrocytes (goat)    | 4 weeks in nonadherent AGA wells | –              |
| 267                       | Differences in ZCs isolated from immature and adult articular cartilage                                | ZC             | –                                           | –                    | Chondrocytes (bovine)  | 1 week in micromass              | –              |
| 262                       | Effect of monolayer expansion dedifferentiation on the mechanical properties and gene expression of ZC | ZC             | Micropatterned fibronectin-coated substrate | UV photocrosslinking | Chondrocytes (porcine) | 1 week                           | –              |

| Ref. | Study goal                                                                                                                          | Zonal features | Matrix                                                             | Fabrication                | Cells (origin)         | <i>In vitro</i>                                   | <i>In vivo</i>               |
|------|-------------------------------------------------------------------------------------------------------------------------------------|----------------|--------------------------------------------------------------------|----------------------------|------------------------|---------------------------------------------------|------------------------------|
| 264  | Redifferentiation of expanded ZC in ALG beads                                                                                       | ZC             | ALG                                                                | Ionic crosslinking         | Chondrocytes (equine)  | 4 weeks with bFGF                                 | –                            |
| 266  | Clarification of ZC spheroids' characteristics                                                                                      | ZC spheroids   | –                                                                  | –                          | Chondrocytes (bovine)  | 3 weeks                                           | –                            |
| 268  | Generation of stratified cartilage constructs                                                                                       | ZC             | Pre incubation in ALG beads                                        | Ionic crosslinking         | Chondrocytes (porcine) | 2 weeks                                           | –                            |
| 269  |                                                                                                                                     |                |                                                                    |                            |                        | 12 days                                           | –                            |
| 270  |                                                                                                                                     |                |                                                                    |                            |                        | 4 weeks                                           | 1 week chondral (pig)        |
| 260  | Fabrication of zonal constructs with photocrosslinked hydrogels                                                                     | ZC             | TCPS                                                               | UV photocrosslinking       | Chondrocytes (bovine)  | 3 weeks                                           | –                            |
| 272  |                                                                                                                                     |                | PEGDA                                                              |                            |                        | 6 weeks                                           | –                            |
| 261  | Composition and organization evaluation of engineered cartilage and the effect chondrocyte dedifferentiation by monolayer expansion | ZC             | COL II-coated filter inserts (monolayer expansion)                 | Solvent casting            | Chondrocytes (bovine)  | 4 weeks in synthetic filter membranes with TGF-β2 | –                            |
| 273  | Shaping scaffold-free zonal constructs                                                                                              | ZC             | Pre incubation in ALG beads followed by seeding in AGA shaped-base | Ionic crosslinking and TIC | Chondrocytes (bovine)  | 29 days                                           | –                            |
| 271  | Generation of stratified cartilage by incorporating ZC pellets in 3D printed scaffolds                                              | ZC pellets     | PEGT/PBT copolymer                                                 | FDM                        | Chondrocytes (equine)  | 31 days with TGF-β2                               | –                            |
| 274  | Fabrication of stratified constructs with ZC sheets obtained by monolayer expansion                                                 | ZC sheets      | –                                                                  | –                          | Chondrocytes (porcine) | 3 weeks                                           | 12 weeks osteochondral (pig) |

| Ref.                                                         | Study goal                                                                                                    | Zonal features                                        | Matrix | Fabrication                   | Cells (origin)                               | <i>In vitro</i>                                      | <i>In vivo</i>               |
|--------------------------------------------------------------|---------------------------------------------------------------------------------------------------------------|-------------------------------------------------------|--------|-------------------------------|----------------------------------------------|------------------------------------------------------|------------------------------|
| 275                                                          |                                                                                                               |                                                       |        |                               |                                              | 3 weeks with TGF- $\beta$ 3                          | 6 weeks osteochondral (rat)  |
| 276                                                          | Engineering zonal constructs with chondrocytes obtained by size-based inertial spiral microchannel separation | ZC                                                    | Fibrin | Thrombin-induced crosslinking | Chondrocytes (porcine)                       | 16 days in dMC and 3 weeks with TGF- $\beta$ 3       | –                            |
| 277                                                          |                                                                                                               |                                                       |        |                               |                                              | 16 days in dMC and 3 weeks with TGF- $\beta$ 3       | 6 months osteochondral (pig) |
| 278                                                          | Friction improvement in self-assembled constructs                                                             | Different SZ:MZ chondrocytes ratios                   | –      | –                             | Chondrocytes (bovine)                        | 4 weeks in nonadherent AGA wells with TGF- $\beta$ 1 | –                            |
| 279                                                          |                                                                                                               | Treatment with extracts of SZ articular cartilage ECM |        |                               |                                              |                                                      |                              |
| <i>Co-culture of chondrocytes and mesenchymal stem cells</i> |                                                                                                               |                                                       |        |                               |                                              |                                                      |                              |
| 284                                                          | Influence of BMMSCs co-culture with ZC on their biosynthetic activity                                         | Co-culture with ZC                                    | ALG    | Ionic crosslinking            | Chondrocytes and BMMSCs (ratio 1:2) (rabbit) | 3 weeks with TGF- $\beta$ 3                          | 8 weeks subcutaneous (mouse) |
| 285                                                          | Fabrication of trilayered construct with zonal phenotype stratification combined with BMMSCs                  | ZC                                                    | HA-MA  | UV photocrosslinking          | Chondrocytes and BMMSCs (ratio 1:4) (bovine) | 16 weeks with TGF- $\beta$ 3                         | –                            |
| 286                                                          | Engineering zonal constructs using chondrocyte-laden hydrogel with a superficial self-assembled layer of MSCs | MSCs in UL and chondrocytes in BL                     | AGA    | TIC                           | Chondrocytes and FPMSCs or BMMSCs (porcine)  | 5 weeks with TGF- $\beta$ 3                          | –                            |

| Ref.                                                                                 | Study goal                                                                                                                               | Zonal features                            | Matrix            | Fabrication                                                      | Cells (origin)                                | <i>In vitro</i>                                                                              | <i>In vivo</i> |
|--------------------------------------------------------------------------------------|------------------------------------------------------------------------------------------------------------------------------------------|-------------------------------------------|-------------------|------------------------------------------------------------------|-----------------------------------------------|----------------------------------------------------------------------------------------------|----------------|
| 287                                                                                  | Control of spheroid growth and fusion to engineer native-like COL anisotropies in engineered cartilage cultured in printed microchambers | Posterior native-like COL fibre alignment | PCL, GEL-MA       | FDM and extrusion and inkjet-based printing UV photocrosslinking | Chondrocytes and BMMSCs (ratio 1:3) (porcine) | 10 weeks with TGF-β3, 3 % O <sub>2</sub> and dynamic stirring (6 mm amplitude at 0.5 mm/sec) | –              |
| <i>Co-culture of articular cartilage progenitor cells and mesenchymal stem cells</i> |                                                                                                                                          |                                           |                   |                                                                  |                                               |                                                                                              |                |
| 227                                                                                  | Generation of stratified cartilage with ACPCs and BMMSCs -laden hydrogel layers                                                          | ACPCs on the UP and BMMSCs on the BL      | GEL-MA            | Extrusion-based printing and UV photocrosslinking                | BMMSCs or ACPCs (equine)                      | 8 weeks with TGF-β1                                                                          | –              |
| 289                                                                                  |                                                                                                                                          |                                           | GEL-MA, GG, HA-MA |                                                                  |                                               | 6 weeks with TGF-β1                                                                          |                |
| 290                                                                                  | Engineering zonal constructs with ACPCs and BMMSCs -laden hydrogel layers                                                                | ACPCs on the UP and BMMSCs on the BL      | AGA               | TIC                                                              | BMMSCs or ACPCs (equine)                      | 4 weeks with TGF-β1 and 2 and 21 % O <sub>2</sub>                                            | –              |
| <i>Mesenchymal stem cells</i>                                                        |                                                                                                                                          |                                           |                   |                                                                  |                                               |                                                                                              |                |
| 291                                                                                  | Control of spheroid growth and fusion to engineer native-like COL anisotropies in engineered cartilage cultured in printed microchambers | Posterior native-like COL fibre alignment | PCL               | MEW and inkjet-based printing                                    | BMMSCs (porcine)                              | 8 weeks with TGF-β3 and 5 % O <sub>2</sub>                                                   | –              |
| 292                                                                                  |                                                                                                                                          |                                           |                   | FDM and inkjet-based printing                                    |                                               | 8 weeks with TGF-β3, 5 % O <sub>2</sub> and dynamic stirring (5 mm at 0.048 Hz)              |                |
| 293                                                                                  | Fabrication of stratified AC using differentiated ADSCs and their endogenous ECM in tissue strands                                       | Cartilage tissue strands alignment        | Sacrificial ALG   | Extrusion-based printing                                         | AMSCs (human)                                 | 5 weeks                                                                                      | –              |

EDAC, 1-ethyl-3-(3-dimethylaminopropyl)carbodiimide hydrochloride; FDM, fused deposition modelling; TCPS, tissue culture polystyrene; TIC, thermally-induced crosslinking; UV, ultraviolet.

**Table S2.** Strategies exploring biological, chemical, mechanical and structural cues separately in zonal constructs and their influence on chondrocytes and MSCs behaviour.

|                                          | <b>Study goal</b>                                                                                     | <b>Zonal features</b>                 | <b>Matrix</b>                     | <b>Fabrication</b>                                   | <b>Cells (origin)</b> | <b><i>In vitro</i></b>                                                    | <b><i>In vivo</i></b>          |
|------------------------------------------|-------------------------------------------------------------------------------------------------------|---------------------------------------|-----------------------------------|------------------------------------------------------|-----------------------|---------------------------------------------------------------------------|--------------------------------|
| <i>Decellularized cartilage explants</i> |                                                                                                       |                                       |                                   |                                                      |                       |                                                                           |                                |
| 294                                      | Repopulation of a decellularized cartilage explant for the development of a specific COL architecture | Immature Benninghoff COL architecture | Decellularized cartilage explants | –                                                    | FPMSCs (human)        | 4 weeks with TGF- $\beta$ 3 and dynamic stirring                          | –                              |
| <i>Cell density and alignment</i>        |                                                                                                       |                                       |                                   |                                                      |                       |                                                                           |                                |
| 295                                      | Fabrication of zonal constructs with a biomimetic chondrocyte density gradient                        | Chondrocyte density gradient          | COL II                            | Extrusion-based printing, TIC                        | Chondrocytes (rabbit) | 3 weeks                                                                   | –                              |
| 296                                      | Fabrication of zonal constructs with a biomimetic chondrocyte density gradient                        | Chondrocyte density gradient          | PCL, ALG, methylcellulose         | FDM, extrusion-based printing and ionic crosslinking | Chondrocytes (human)  | 25 days with TGF- $\beta$ 1 and TGF- $\beta$ 3                            | –                              |
| 297                                      | Engineering zonal cytoarchitecture using magnetically guided cell patterning                          | Zonal chondrocyte alignment           | ALG                               | Ionic crosslinking                                   | Chondrocytes (human)  | <i>In vitro</i> : 2 weeks with TGF- $\beta$ 1;<br><i>Explant</i> : 1 week | 4 weeks osteochondral (rabbit) |
| 298                                      | Engineering DZ-like cytoarchitecture with high-resolution acoustic cell patterning                    | DZ-like chondrocyte alignment         | AGA                               | TIC                                                  | Chondrocytes (bovine) | 5 weeks with TGF- $\beta$ 3                                               | –                              |

|     | <b>Study goal</b>                                                                                          | <b>Zonal features</b>                           | <b>Matrix</b>                                                             | <b>Fabrication</b>                                          | <b>Cells (origin)</b>            | <b><i>In vitro</i></b>      | <b><i>In vivo</i></b>    |
|-----|------------------------------------------------------------------------------------------------------------|-------------------------------------------------|---------------------------------------------------------------------------|-------------------------------------------------------------|----------------------------------|-----------------------------|--------------------------|
|     |                                                                                                            |                                                 | <i>Matrix molecules</i>                                                   |                                                             |                                  |                             |                          |
| 299 | Influence of ECM molecules on chondrocyte phenotype and neocartilage formation on 2D and 3D environments   | Biomimetic ECM molecules                        | Decorin, biglycan, tenascin, COL II, HA, osteopontin-coated surfaces; ALG | Solvent-casting                                             | Chondrocytes (human)             | 2 weeks with TGF- $\beta$ 1 | –                        |
| 300 | Incorporation of HA and CS onto ALG hydrogels to differentiate MSCs into ZC                                | ZC                                              | ALG, HA, CS                                                               | Ionic crosslinking                                          | Chondrocytes and BMMSCs (bovine) | 3 weeks with TGF- $\beta$ 3 | –                        |
| 301 | Biological response of ZC to biomimetic matrix molecules                                                   | Biomimetic matrix molecules                     | PEGDA, PEG-COL I, PEG-HA, PEG-CS                                          | UV photocrosslinking                                        | Chondrocytes (bovine)            | 3 weeks                     | –                        |
| 302 | Differentiation of BMMSCs into ZC on homogeneous or trilayered constructs with biomimetic matrix molecules | Biomimetic matrix molecules                     | PEGDA, PEG-CS-MMP-pep, PEG-CS, PEG-HA, CS, HA                             | UV photocrosslinking                                        | BMMSCs (mouse)                   | 6 weeks with TGF- $\beta$ 1 | –                        |
| 303 |                                                                                                            |                                                 |                                                                           |                                                             |                                  |                             |                          |
| 304 | Differentiation of BMMSCs into ZC on trilayered construct with biomimetic matrix molecules                 | Biomimetic matrix molecules                     | PEGDA, MMP-pep, CS-MA, HA-MA                                              | UV photocrosslinking                                        | BMMSCs (human)                   | 3 weeks with TGF- $\beta$ 3 | –                        |
| 305 | Effect of matrix molecule gradient of trilayered constructs on chondrocyte fate                            | Matrix molecules gradient                       | GEL-MA, HA-MA                                                             | Stereolithography                                           | Chondrocytes (porcine)           | 2 weeks with TGF- $\beta$ 3 | –                        |
| 307 | Promoting endogenous AC regeneration with cECM-derived constructs and a bone-fixation device               | SZ-like fibre alignment in the surface and cECM | cECM                                                                      | Freeze-drying and annealing and dehydrothermal crosslinking | BMMSCs (human)                   | 4 weeks with TGF- $\beta$ 3 | 6 months chondral (goat) |

|                                     | <b>Study goal</b>                                                                                    | <b>Zonal features</b>                            | <b>Matrix</b>                                  | <b>Fabrication</b>                                      | <b>Cells (origin)</b>           | <b><i>In vitro</i></b>                                  | <b><i>In vivo</i></b>        |
|-------------------------------------|------------------------------------------------------------------------------------------------------|--------------------------------------------------|------------------------------------------------|---------------------------------------------------------|---------------------------------|---------------------------------------------------------|------------------------------|
| 306                                 | Fabrication of bilayered zonal constructs with enhanced lubrication and compressive properties       | HA's top layer for improved lubrication and cECM | HA, cECM particles                             | Extrusion-based printing, TIC                           | Chondrocytes (bovine)           | <i>In vitro</i> : 2 weeks;<br><i>Explant</i> : 1 week   | –                            |
| 308                                 | Compositional and cellular gradients to regenerate full-thickness chondral defect using microfluidic | Cellular and matrix molecules gradient           | ALG, GEL-MA, CS-MA, HA-MA, TCP                 | Co-axial extrusion-based printing, UV photocrosslinking | Chondrocytes and BMMSCs (human) | 3 weeks with TGF- $\beta$ 3                             | 12 weeks osteochondral (rat) |
| <i>Zone-specific growth factors</i> |                                                                                                      |                                                  |                                                |                                                         |                                 |                                                         |                              |
| 320                                 | Effect of growth factors on ZC                                                                       | ZC                                               | –                                              | –                                                       | Chondrocytes (goat)             | 3 weeks with TGF- $\beta$ 1, IGF-I and bFGF             | –                            |
| 321                                 | Effect of growth factors on ZC biomechanics and cytoskeleton                                         | ZC                                               | –                                              | –                                                       |                                 | 18 hours with TGF- $\beta$ 1 and IGF-I                  | –                            |
| 322                                 | Effect of growth factors on differentiation and maturation of encapsulated BMMSCs                    | Sequential addition of growth factors            | Fetal or adult cECM-MA                         | UV photocrosslinking                                    | BMMSCs (human)                  | 3 weeks with TGF- $\beta$ 1, BMP-7, IHH and IGF-1       | –                            |
| 323                                 | Induction of spatiotemporal gradients in self-assembled BMMSCs constructs                            | Spatiotemporal growth factors induction          | COL I-coated filter inserts                    | Solvent-casting                                         | BMMSCs (human)                  | 10 weeks with TGF- $\beta$ 3, $\beta$ -GP and thyroxine | 4 weeks subcutaneous (mouse) |
| 325                                 | Fabrication of trilayered zonal constructs with encapsulated zonal-specific growth factors           | Zonal-specific growth factors                    | PEGDA, PEO, mECM, TGF- $\beta$ 1, BMP-7, IGF-1 | EHD printing and UV photocrosslinking                   | BMMSCs (rabbit)                 | 3 weeks                                                 | 24 weeks chondral (rabbit)   |



|     | <b>Study goal</b>                                                                         | <b>Zonal features</b>                                | <b>Matrix</b>          | <b>Fabrication</b>                          | <b>Cells (origin)</b>                    | <b><i>In vitro</i></b>                               | <b><i>In vivo</i></b>        |
|-----|-------------------------------------------------------------------------------------------|------------------------------------------------------|------------------------|---------------------------------------------|------------------------------------------|------------------------------------------------------|------------------------------|
|     |                                                                                           |                                                      | <i>Stiffness</i>       |                                             |                                          |                                                      |                              |
| 326 | Effect of different stiffnesses of bilayered construct on encapsulated chondrocytes or ZC | Depth-dependent stiffness                            | AGA                    | TIC                                         | Chondrocytes (bovine)                    | 4 weeks                                              | –                            |
| 327 |                                                                                           |                                                      |                        |                                             |                                          | 6 weeks with TGF- $\beta$ 3                          |                              |
| 328 | Fabrication of bilayered constructs mimicking zonal mechanical and lubrication properties | Depth-dependent stiffness and GO incorporation on SZ | PEGDA, GG, GO          | UV photocrosslinking and ionic crosslinking | Osteoarthritic chondrocytes (human)      | 6 days treatment with hydrogels' degradation product | –                            |
| 331 | Fabrication of bi-layered hydrogel construct with stiffness gradient                      | Stiffness gradient                                   | PEG, PEGDA, silk fibre | UV photocrosslinking                        | BMMSCs (human)                           | 3 weeks with TGF- $\beta$ 3                          | –                            |
| 332 | Fabrication of 3D woven textiles with stiffness gradients infused with a hybrid hydrogel  |                                                      | PVDF, PAAm-ALG         | Ionic and MBAA-induced crosslinking         | –                                        | –                                                    | –                            |
| 334 | Effect of gradient stiffness on encapsulated chondrocytes and BMMSCs behaviour            |                                                      | PEG, CS                | UV photocrosslinking                        | Chondrocytes (bovine) and BMMSCs (human) | 3 weeks with TGF- $\beta$ 3 and bFGF                 | –                            |
| 335 |                                                                                           |                                                      | PEG-SH, PEG-NB, CS-MA  | UV photocrosslinking                        | Chondrocytes (bovine) and BMMSCs (human) | 3 weeks with TGF- $\beta$ 3 and 20 % O <sub>2</sub>  | 6 weeks subcutaneous (mouse) |

|                         | <b>Study goal</b>                                                                                                                                                     | <b>Zonal features</b>                                 | <b>Matrix</b>             | <b>Fabrication</b>                            | <b>Cells (origin)</b> | <b><i>In vitro</i></b>                 | <b><i>In vivo</i></b>           |
|-------------------------|-----------------------------------------------------------------------------------------------------------------------------------------------------------------------|-------------------------------------------------------|---------------------------|-----------------------------------------------|-----------------------|----------------------------------------|---------------------------------|
| 333                     | Mimicking AC's mechanical behaviour                                                                                                                                   | Posterior native-like DZ chondrocyte arrangement      | Polyprotein               | Chain entanglement and denatured crosslinking | MC3T3-E1 cells        | 10 days with $\beta$ -glycerophosphate | 12 weeks osteochondral (rabbit) |
| <i>Topographic cues</i> |                                                                                                                                                                       |                                                       |                           |                                               |                       |                                        |                                 |
| 338                     | Mimicking the SZ fibre alignment and nanotopography                                                                                                                   | SZ fibre alignment and nanotopography                 | PCL                       | Electrospinning                               | BMMSCs (human)        | 5 weeks with TGF- $\beta$ 1            | –                               |
| 339                     | Effect of fibre orientation on the friction and damage of SZ                                                                                                          | SZ frictional and mechanical properties               |                           |                                               | Chondrocytes (bovine) | 4 weeks with TGF- $\beta$ 3            | –                               |
| 340                     | Fabrication of SZ-like constructs with improved bio-inductivity and porosities                                                                                        | Biomimetic matrix molecule and SZ-like nanotopography | PCL, sacrificial PEG, GEL | Electrospinning                               | ACPCs (bovine)        | 2 weeks                                | –                               |
| 341                     | Effect of zonal fibre size and orientation on the mechanical properties of the trilayered constructs and their ability to support <i>in vitro</i> cartilage formation | Zone-specific fibre size and orientation              | PCL                       | Electrospinning                               | Chondrocytes (bovine) | 5 weeks with TGF- $\beta$ 3            | –                               |
| 342                     | Fabrication of trilayered constructs with zone-specific topographic alignments                                                                                        | Zone-specific fibre and channel alignments            | PLA, HA                   | Electrospinning and BDDE-induced crosslinking | Chondrocytes (bovine) | 2 weeks                                | –                               |
| 343                     |                                                                                                                                                                       |                                                       | PCL                       |                                               | –                     | –                                      |                                 |
| 345                     | Fabrication of bi and trilayered constructs with zone-specific fibre alignments                                                                                       | Zone-specific fibre alignments                        | PCL, sacrificial PEG      | Electrospinning                               | ACPCs (bovine)        | 3 weeks                                | –                               |
| 344                     |                                                                                                                                                                       |                                                       | PCL, sacrificial PEG, GEL |                                               |                       |                                        |                                 |

|      | <b>Study goal</b>                                                                                    | <b>Zonal features</b>                            | <b>Matrix</b>                                      | <b>Fabrication</b>                                                          | <b>Cells (origin)</b>                        | <b><i>In vitro</i></b>                                               | <b><i>In vivo</i></b>     |
|------|------------------------------------------------------------------------------------------------------|--------------------------------------------------|----------------------------------------------------|-----------------------------------------------------------------------------|----------------------------------------------|----------------------------------------------------------------------|---------------------------|
| f346 | Fabrication of a trilayered construct with zonal-fibre alignment                                     | Zonal fibre alignment                            | PLLA, fibrinogen                                   | Electrospinning, thrombin-induced crosslinking                              | C28/I2 immortalized chondrocyte line (human) | 1 week                                                               | –                         |
| 347  | Fabrication of a woven porous scaffold from electrocompacted COL threads to accommodate cell-pellets | COL fibril alignment mimicked by weaving pattern | Col                                                | Electrochemical compaction, thread weaving and genipin-induced crosslinking | BMMSCs (human)                               | 3 days for pellet formation and 4 weeks with TGF- $\beta$ 3 and bFGF | –                         |
| 349  | Effect of extrusion-induced polymer molecule alignment on BMMSCs differentiation                     | Micro and nanoscaled polymer molecule alignment  | PLGA                                               | Extrusion-based printing                                                    | BMMSCs (human)                               | 1 day                                                                | 7 days subcutaneous (rat) |
| 350  | Effect of the extrusion-induced COL fibril alignment on BMMSCs migration from pellets                | COL fibril extrusion-induced alignment           | THA, COL I                                         | Enzymatic cross-linking and extrusion-based printing                        | BMMSCs (human)                               | 3 weeks with TGF- $\beta$ 1                                          | –                         |
| 351  | Fabrication of trilayered constructs with zone-specific fibre alignments                             | Zone-specific fibre alignments                   | PEOT/PBT                                           | EHD inkjet printing                                                         | BMMSCs (human)                               | 3 weeks with TGF- $\beta$ 3                                          | –                         |
| 352  | Fabrication of bilayered constructs with one layer magnetically aligned                              | COL fibril magnetic alignment                    | AGA, COL I, streptavidin-coated iron nanoparticles | Inkjet-based printing                                                       | Chondrocytes (human)                         | 3 weeks with TGF- $\beta$ 1                                          | –                         |
| 353  | COL I fibrils alignment gradient triggered by matrices' confined compression                         | Fibrils alignment gradient through densification | COL I                                              | TIC                                                                         | Chondrocytes (bovine)                        | 1 week                                                               | –                         |

|                                             | <b>Study goal</b>                                                                                                      | <b>Zonal features</b>                                                                      | <b>Matrix</b>                  | <b>Fabrication</b>                                         | <b>Cells (origin)</b> | <b><i>In vitro</i></b>          | <b><i>In vivo</i></b>      |
|---------------------------------------------|------------------------------------------------------------------------------------------------------------------------|--------------------------------------------------------------------------------------------|--------------------------------|------------------------------------------------------------|-----------------------|---------------------------------|----------------------------|
| 355                                         | Generation of 3D patterned constructs to control cellular orientation for SZ and MZ                                    | Alignment patterns                                                                         | PEGDMA, CH-g-PNIPAAm           | Photolithography and TIC                                   | BMMSCs (murine)       | 4 weeks with TGF- $\beta$ 1     | –                          |
| 356                                         | Influence of SZ-based chondroinductive nanotopography on AMSCs                                                         | SZ nanotopographic cues                                                                    | Silk, kartogenin               | Solvent casting and colloidal lithography                  | AMSCs (human)         | 2 weeks with chondrogenic media | –                          |
| 357                                         | Effect of the surface micro and nanotopographic on chondrocyte behaviour                                               | Zonal topographic cues                                                                     | PMDS, CNTs                     | Curing in patterned molds and spraying                     | Chondrocytes (bovine) | 2 weeks                         | –                          |
| <i>Pore size, alignment and/or porosity</i> |                                                                                                                        |                                                                                            |                                |                                                            |                       |                                 |                            |
| 362                                         | Effect of depth-dependent pore sizes on cell behaviour                                                                 | Pore size gradient (200 to 1650 $\mu$ m)                                                   | PEGT/PBT                       | FDM                                                        | Chondrocytes (bovine) | 3 weeks in spinner flask        | –                          |
| 363                                         |                                                                                                                        | Pore size gradient (500 to 1100 $\mu$ m)                                                   |                                |                                                            | BMMSCs (human)        | 5 weeks with TGF- $\beta$ 3     |                            |
| 364                                         | Effect of pore size on chondrogenic differentiation of BMMSCs and underlying mechanisms                                | Pore size gradient (150 to 750 $\mu$ m)                                                    | PCL, GEL, Fibrinogen, HA       | Extrusion-based printing and thrombin-induced crosslinking | BMMSCs (rabbit)       | 6 weeks                         | 24 weeks chondral (rabbit) |
| 365                                         | Effect of pore size and geometry of trilayered constructs on differentiated BMMSCs alignment and biosynthetic activity | Pore size (300 to 700 $\mu$ m) and geometry (rectangular, triangular and rhombic) gradient | PCL, ALG-MA                    | FDM and blue light photocrosslinking                       | BMMSCs (rat)          | 3 weeks with TGF- $\beta$ 3     | –                          |
| 366                                         | Design of computational model to predict the most biomechanically-suited soft network composite                        | Pore size gradient (800 to 200 $\mu$ m)                                                    | PCL, HAp nanoparticles, GEL-MA | MEW, visible light photocrosslinking                       | –                     | –                               | –                          |

|     | <b>Study goal</b>                                                              | <b>Zonal features</b>                                  | <b>Matrix</b>                                                                 | <b>Fabrication</b>                            | <b>Cells (origin)</b>                             | <b><i>In vitro</i></b>                                            | <b><i>In vivo</i></b>           |                              |
|-----|--------------------------------------------------------------------------------|--------------------------------------------------------|-------------------------------------------------------------------------------|-----------------------------------------------|---------------------------------------------------|-------------------------------------------------------------------|---------------------------------|------------------------------|
| 367 | Effect of GEL source and photoinitiator type on chondrocyte redifferentiation  | Pore size gradient (800 to 200 $\mu\text{m}$ )         | PCL, GEL-MA                                                                   | MEW and UV or visible light photocrosslinking | Chondrocytes (human)                              | 4 weeks with TGF- $\beta$ 3                                       | –                               |                              |
| 368 | Fabrication of bilayered zonal constructs with SZ and DZ-like pore sizes       | Depth-dependent pore sizes (50 and 800 $\mu\text{m}$ ) | PCL, GEL-MA                                                                   | MEW and UV photocrosslinking                  | Chondrocytes (equine)                             | 4 weeks with TGF- $\beta$ 1 or DC loading (0-20 % strain at 1 Hz) | –                               |                              |
| 369 | Effect of vertical pore alignment on cell behaviour and zonal tissue formation | DZ vertical alignment                                  | PLGA                                                                          | TIPS and freeze-drying                        | Chondrocytes (porcine)                            | 12 weeks                                                          | 12 weeks subcutaneous (mouse)   |                              |
| 370 |                                                                                |                                                        | PLGA, cECM                                                                    | TIPS and freeze-drying                        | BMMSCs (rabbit)                                   | 1 week                                                            | –                               |                              |
| 371 |                                                                                |                                                        |                                                                               | TIPS, freeze-drying, EDC/NHS crosslinking     | BMMSCs (rabbit)                                   | 3 days                                                            | 24 weeks osteochondral (rabbit) |                              |
| 372 |                                                                                |                                                        |                                                                               | cECM                                          | TIPS, freeze-drying, genipin-induced crosslinking | BMMSCs (rabbit)                                                   | 13 days with TGF- $\beta$ 3     | 4 weeks subcutaneous (mouse) |
| 373 |                                                                                |                                                        | 1 week with TGF- $\beta$ 3                                                    |                                               |                                                   |                                                                   | 24 weeks chondral (rabbit)      |                              |
| 374 |                                                                                |                                                        |                                                                               | PVA, carrageenan                              | TIPS, freeze-drying                               | ATDC5 cells (mouse)                                               | 4 weeks                         | 4 weeks subcutaneous (rat)   |
| 375 |                                                                                |                                                        | Effect of aligned pore architecture on chondrogenic differentiation of FPMSCs | Aligned pore alignment (SZ and DZ)            | GEL                                               | Directional freeze-drying and EDC/NHS crosslinking                | FPMSCs (goat)                   | 4 weeks with TGF- $\beta$ 1  |

|     | <b>Study goal</b>                                                                                                            | <b>Zonal features</b>                      | <b>Matrix</b>                           | <b>Fabrication</b>                                                                       | <b>Cells (origin)</b> | <b><i>In vitro</i></b>                                                                            | <b><i>In vivo</i></b>           |
|-----|------------------------------------------------------------------------------------------------------------------------------|--------------------------------------------|-----------------------------------------|------------------------------------------------------------------------------------------|-----------------------|---------------------------------------------------------------------------------------------------|---------------------------------|
| 376 | Effect of pore orientation on <i>in vivo</i> tissue formation                                                                | Constructs with zonal-like pore alignments | Silk fibroin                            | Directional freeze-drying and methanol-induced crosslinking                              | BMMSCs (human)        | 1 week                                                                                            | 12 weeks osteochondral (rabbit) |
| 377 | Fabrication of TGF- $\beta$ 3-loaded constructs with aligned pore microstructure reinforced with PLCL framework              | Aligned pores                              | PLCL, ALG, ALG sulphate, TGF- $\beta$ 3 | Extrusion-induced printing hydrazide or ionic crosslinking and directional freeze-drying | BMMSCs (porcine)      | 2 weeks with TGF- $\beta$ 3 and 5 % O <sub>2</sub> , followed by 10 days with continuous stirring | –                               |
| 378 |                                                                                                                              |                                            |                                         |                                                                                          | Chondrocytes (goat)   | 2 weeks                                                                                           | –                               |
| 379 | Influence of pore orientation on the mechanical properties, cell distribution of zonal constructs and zonal tissue formation | Pore alignment mimicking COL organization  | CH, GEL                                 | TIPS, freeze-drying and genipin-induced crosslinking                                     | BMSCs (rabbit)        | 4 weeks                                                                                           | 4 months osteochondral (rabbit) |
| 380 |                                                                                                                              |                                            | COL, HA-MA                              | Glutaraldehyde-induced crosslinking, freezing and photocrosslinking                      | Chondrocytes (human)  | 1 day                                                                                             | –                               |
| 381 | Fabrication of trilayered constructs with zonal pore alignment                                                               | Pore alignment mimicking COL organization  | PLGA, cECM                              | LT-FDM, TIPS, freeze-drying and genipin-induced crosslinking                             | –                     | –                                                                                                 | –                               |

MMP-pep, matrix metalloproteinase-sensitive peptides; mECM, meniscus-derived extracellular matrix; PET, polyethylene terephthalate; PAAm-ALG, polyacrylamide-ALG hybrid; PEG-SH, PEG-dithiol; PEG-NB, PEG-norbornene; PEOT/PBT, poly(ethylene oxide terephthalate)/poly-(butylene terephthalate); BDDE, 1,4-butanediol diglycidyl ether; EDAC/NHS, 1-ethyl-3-(3-dimethylaminopropyl)carbodiimide hydrochloride/ N-hydroxysuccinimide; LT-FDM, low temperature fused deposition modelling; PVA-BA, poly(vinyl alcohol)-boric acid; MBAA, N'-methylene bis-acrylamide.

**Table S3.** Strategies exploring the combination of multiple cues in zonal constructs and their influence on chondrocytes and MSCs behaviour.

|                                                                                     | <b>Study goal</b>                                                                                                                 | <b>Zonal features</b>                                                                                                 | <b>Matrix</b>                        | <b>Fabrication</b>                                                                     | <b>Cells (origin)</b> | <b><i>In vitro</i></b>                                                                 | <b><i>In vivo</i></b> |
|-------------------------------------------------------------------------------------|-----------------------------------------------------------------------------------------------------------------------------------|-----------------------------------------------------------------------------------------------------------------------|--------------------------------------|----------------------------------------------------------------------------------------|-----------------------|----------------------------------------------------------------------------------------|-----------------------|
| <i>Cell density and zone-specific factors and stiffness and/or topographic cues</i> |                                                                                                                                   |                                                                                                                       |                                      |                                                                                        |                       |                                                                                        |                       |
| 382                                                                                 | Effect of biomimetic cell densities, growth factors culture, stiffnesses and nanofiber alignment on chondrogenic BMMSCs behaviour | Zonal cell densities (60 to 15×10 <sup>6</sup> ), growth factors, stiffnesses and nanofiber topography and alignments | SPELA, Ac-GRGD, HAp, PLA nanofibres  | UV photocrosslinking and electrospinning                                               | BMMSCs (human)        | 3 weeks with TGF-β1 and BMP-7 for SZ, TGF-β1 and IGF-1 for MZ, TGF-β1 and β-GP for CCZ | –                     |
| 383                                                                                 |                                                                                                                                   |                                                                                                                       |                                      |                                                                                        |                       |                                                                                        | –                     |
| <i>Matrix molecules and stiffness</i>                                               |                                                                                                                                   |                                                                                                                       |                                      |                                                                                        |                       |                                                                                        |                       |
| 384                                                                                 | Combinatorial effect of ECM matrix molecules and stiffnesses on chondrogenic AMSCs behaviour                                      | Biomimetic matrix molecules and stiffnesses                                                                           | PEG-DMA, CS-MA, HA-MA, HS-MA, GEL-MA | UV photocrosslinking                                                                   | AMSCs (human)         | 3 weeks with TGF-β3 and bFGF                                                           | –                     |
| 385                                                                                 | Fabrication of dual-gradient zonal constructs                                                                                     | Biochemical and stiffness gradients                                                                                   | PEG, CS                              | UV photocrosslinking                                                                   | Chondrocytes (bovine) | 3 weeks                                                                                | –                     |
| <i>Matrix molecules and topographic cues</i>                                        |                                                                                                                                   |                                                                                                                       |                                      |                                                                                        |                       |                                                                                        |                       |
| 386                                                                                 | Influence of mAGC on the constructs' proteolytic degradation and chondrocytes' gene expression modulation                         | Biomimetic matrix molecule and COL fibrils magnetic alignment                                                         | COL I, CS, HA                        | TIC                                                                                    | Chondrocytes (bovine) | 8 days with IL-1β                                                                      | –                     |
| 387                                                                                 | Fabrication of trilayered constructs with biomimetic chemical and topographic alignment                                           | Biomimetic matrix molecules and μRB topographic alignment                                                             | GEL-MA, CS-MA                        | μRB wet-spinning, glutaraldehyde and dithiothreitol crosslinking, UV photocrosslinking | BMMSCS (human)        | 3 weeks with TGF-β3                                                                    | –                     |

|                                                                                     | <b>Study goal</b>                                                                                                                         | <b>Zonal features</b>                                   | <b>Matrix</b>                                                                    | <b>Fabrication</b>                                                  | <b>Cells (origin)</b>                              | <b><i>In vitro</i></b>       | <b><i>In vivo</i></b>                    |
|-------------------------------------------------------------------------------------|-------------------------------------------------------------------------------------------------------------------------------------------|---------------------------------------------------------|----------------------------------------------------------------------------------|---------------------------------------------------------------------|----------------------------------------------------|------------------------------|------------------------------------------|
| 388                                                                                 | Engineering fibre-reinforced gradient hydrogels to facilitate integration with bone                                                       | Matrix molecules and fibrous topographic cues           | PCL, CS, bioactive glass, AGA, GEL                                               | Sol-gel, electrospinning and TIC                                    | Chondrocytes (goat)                                | 3 weeks                      | –                                        |
| 389                                                                                 | Biological effect of the CS-functionalized aligned fibrous network on chondrocyte and BMMSCs behaviour <i>in vitro</i> and <i>in vivo</i> | Biomimetic matrix molecule and SZ-like fibre alignment  | PLLA, CS                                                                         | Electrospinning and PDA-induced coating                             | Chondrocytes and BMMSCs (rabbit)                   | 7 days with TGF- $\beta$ 3   | 16 weeks chondral (rabbit)               |
| <i>Matrix molecules and pore size or alignment</i>                                  |                                                                                                                                           |                                                         |                                                                                  |                                                                     |                                                    |                              |                                          |
| 390                                                                                 | Fabrication of multilayered zonal constructs with biochemical and pore sizes gradients                                                    | Matrix molecules and pore size gradients                | CH, PCL, COL II                                                                  | TIPS, freeze-drying, photothermal heating and EDAC/NHS crosslinking | Chondrocytes (rabbit)                              | 3 weeks                      | –                                        |
| 361                                                                                 |                                                                                                                                           |                                                         | CH, PCL, COL II, CS                                                              |                                                                     |                                                    |                              |                                          |
| 391                                                                                 | Fabrication of trilayered constructs with zone-specific biochemical composition and pore orientations                                     | Matrix molecules ratio gradient and pore alignments     | COL I, HA, HAp                                                                   | TIPS, freeze-drying and EDAC/NHS crosslinking                       | –                                                  | –                            | –                                        |
| 392                                                                                 |                                                                                                                                           |                                                         | Chondrocytes and BMMSCS (mouse)                                                  |                                                                     | 3 weeks with TGF- $\beta$ 1 and 5 % O <sub>2</sub> | 8 weeks subcutaneous (mouse) |                                          |
| 393                                                                                 | Fabrication of trilayered constructs with biomimetic chemical properties and pore alignments                                              | Matrix molecules gradient and pore alignments           | PLA, sCNCs, pCNCs, HAp                                                           | TIPS                                                                | Fetal chondrocytes (human)                         | 4 weeks                      | –                                        |
| <i>Matrix molecules and zone-specific growth factors and pore size or alignment</i> |                                                                                                                                           |                                                         |                                                                                  |                                                                     |                                                    |                              |                                          |
| 394                                                                                 | Fabrication of bilayer biomimetic construct with depth-dependent biochemical and morphological properties                                 | Matrix molecules, growth factors and pore size gradient | pCOL I, CS, SF, HA, PLGA microspheres with kartogenin, TPHNs with TGF- $\beta$ 1 | TIPS, freeze-drying                                                 | BMMSCS (rat)                                       | 1 week                       | 16 weeks osteochondral OA model (rabbit) |



|                                                                | <b>Study goal</b>                                                                                                                                             | <b>Zonal features</b>                                             | <b>Matrix</b>                                                     | <b>Fabrication</b>                                         | <b>Cells (origin)</b> | <b><i>In vitro</i></b> | <b><i>In vivo</i></b>                                             |
|----------------------------------------------------------------|---------------------------------------------------------------------------------------------------------------------------------------------------------------|-------------------------------------------------------------------|-------------------------------------------------------------------|------------------------------------------------------------|-----------------------|------------------------|-------------------------------------------------------------------|
| <i>Zone-specific growth factors and pore size or alignment</i> |                                                                                                                                                               |                                                                   |                                                                   |                                                            |                       |                        |                                                                   |
| 395                                                            | Fabrication of dual-factor releasing and gradient-structured BMMSCS-laden multilayered constructs                                                             | Zone-specific growth factors and pore size gradients              | PCL, GEL, Fibrinogen, HA, PLGA microspheres with TGF-β3 and BMP-4 | Extrusion-based printing and thrombin-induced crosslinking | BMMSCS (rabbit)       | 12 weeks               | 12 weeks subcutaneous (mouse) and 24 weeks osteochondral (rabbit) |
| 396                                                            | Effect of zone-specific growth factors and pore size and geometry of trilayered constructs on the differentiation and tissue formation of encapsulated BMMSCS | Zone-specific growth factors and pore size and geometry gradients | PCEC, GEL-MA and PLGA microspheres with TGF-β3, BMP-7 and BMP-2   | MEW, FDM, inkjet-based printing and UV photocrosslinking   |                       | 2 weeks                | 24 weeks osteochondral (rabbit)                                   |
| 397                                                            | Effect of zone-specific growth factors and pore size gradient of trilayered constructs on the differentiation and tissue formation of BMMSCS                  | Zone-specific growth factors and pore size gradients              | PCL, HAp, PLGA microspheres with TGF-β3, BMP-7 and IGF-1          | MEW and inkjet-based printing                              |                       | 3 weeks                | 12 weeks osteochondral (rabbit)                                   |
| <i>Stiffness and topographic cues</i>                          |                                                                                                                                                               |                                                                   |                                                                   |                                                            |                       |                        |                                                                   |
| 398                                                            | Effect of the substate stiffness and topography on the chondrogenic differentiation of BMMSCs                                                                 | Stiffness and topography                                          | PCL, PLA, PGA                                                     | Nanoimprint lithography                                    | BMMSCs (human)        | 6 weeks with TGF-β3    | –                                                                 |
| 399                                                            | Effect of genipin concentration on the mechanical properties of zonal electrospun constructs                                                                  | Topographic cues and zonal stiffness                              | CH, PEO                                                           | Electrospinning and genipin-induced crosslinking           | Chondrocytes (human)  | 3 weeks with TGF-β3    | –                                                                 |
| 400                                                            | Fabrication of bio-inspired cellulose reinforced anisotropic composite hydrogel with zonal properties                                                         | Topographic cues and zonal stiffness                              | PEGDA, cellulose fabric, nanofibers and wood                      | UV photocrosslinking                                       | BMMSCs (–)            | 2 weeks with TGF-β3    | –                                                                 |

|     | <b>Study goal</b>                                                                                                                                 | <b>Zonal features</b>                                                     | <b>Matrix</b>                        | <b>Fabrication</b>                                                  | <b>Cells (origin)</b>             | <b><i>In vitro</i></b>      | <b><i>In vivo</i></b>        |
|-----|---------------------------------------------------------------------------------------------------------------------------------------------------|---------------------------------------------------------------------------|--------------------------------------|---------------------------------------------------------------------|-----------------------------------|-----------------------------|------------------------------|
|     | <i>Topographic cues and pore size or alignment</i>                                                                                                |                                                                           |                                      |                                                                     |                                   |                             |                              |
| 401 | Fabrication of bilayered zonal constructs by electrospinning of aligned polymeric layer onto particulate-templated scaffolds                      | Zone-specific fibre alignment and pore size                               | PCL                                  | Electrospinning and solvent-casting and particulate leaching        | Chondrocyte (bovine)              | 5 weeks with TGF- $\beta$ 3 |                              |
| 402 | Fabrication of five-layered zonal constructs with combinatorial morphologic cues                                                                  | Zone-specific fibre alignment and pore orientation and stiffness gradient | PCL and sacrificial GEL microspheres | Electrospinning, porogen leaching, TIPS and freeze-drying           | Chondrocytes (bovine and porcine) | 4 weeks with TGF- $\beta$ 3 | 6 months osteochondral (pig) |
| 403 | Fabrication of trilayered zonal constructs with zone-specific fibre alignment and pore orientation by combining cryoprinting with electrospinning | Zone-specific fibre alignment and pore orientation                        | PCL                                  | Extrusion-based printing, TIPS, freeze-drying and electrospinning   | BMMSCs (rat)                      | 4 weeks with TGF- $\beta$ 3 | –                            |
| 404 |                                                                                                                                                   |                                                                           |                                      |                                                                     | Chondrocytes (human)              | 5 weeks with TGF- $\beta$ 3 | –                            |
| 405 | Fabrication of four-layered zonal constructs by combining electrospinning with freeze-drying                                                      | Zone-specific fibre alignment and pore size and orientation               | GEL, bMP, cMP                        | Electrospinning, TIC, freeze-drying and glutaraldehyde crosslinking | BMMSCs (human)                    | 10 days                     | –                            |

Ac-GRGD, acrylamide-terminated glycine-arginine-glycine aspartic acid peptide; IL-1 $\beta$ , interleukin 1 beta; bMP, bone microparticles; cMP, cartilage microparticles.

**Table S4.** Exploring mechanical and biochemical stimuli and their influence on chondrocytes and BMMSCs behaviour

|     | <b>Study goal</b>                                                                                                          | <b>Zonal features</b>                          | <b>Matrix</b> | <b>Fabrication</b> | <b>Cells (origin)</b>               | <b>Stimulus</b>     | <b>In vitro</b>                                                                                                                    |
|-----|----------------------------------------------------------------------------------------------------------------------------|------------------------------------------------|---------------|--------------------|-------------------------------------|---------------------|------------------------------------------------------------------------------------------------------------------------------------|
|     | <i>Mechanical stimulus</i>                                                                                                 |                                                |               |                    |                                     |                     |                                                                                                                                    |
| 410 | Influence of compressive strain on the response of ZC                                                                      | ZC and DC stimulus                             | AGA           | TIC                | Chondrocytes (bovine)               | DC                  | 3 days with DC loading (15 % strain at 0.3, 1, 3 Hz)                                                                               |
| 411 | Influence of short- and long-term DC on zonal osteoarthritic chondrocytes                                                  | ZC and DC stimulus                             | ALG           | Ionic crosslinking | Osteoarthritic chondrocytes (human) | DC                  | 2 weeks pre-culture and 2 weeks with TGF- $\beta$ 1 and DC loading (5, 15 and 50 % strain at 1 Hz) during 1, 3 or 12 hours per day |
| 412 | Influence of pre-culture and DC on zonal osteoarthritic chondrocytes expression                                            |                                                |               |                    |                                     |                     | 2 weeks pre-culture and 2 weeks with TGF- $\beta$ 1 and DC loading (50 % strain at 1 Hz) during 3 hours per day                    |
| 413 | Analysis of compressive strain fields of cell-laden hydrogel constructs subjected to horizontal DC loading                 | Zone-specific chondrocyte deformation patterns | COL I, AGA    | TIC                | Chondrocytes (mouse)                | DC                  | 1 week after which DC was applied (5 and 15 % strain at 20 $\mu$ m/sec)                                                            |
| 414 | Effect of dynamic loading on chondrocyte-laden zonal constructs with stiffness gradient                                    | Stiffness gradient and DC stimulus             | AGA           | TIC                | Chondrocytes (bovine)               | DC                  | 4 weeks with DC loading (40 $\mu$ m amplitude at 1 Hz) for 3 hours per day and 5 days per week                                     |
| 415 | Computational model to predict collagen network architecture upon exposure to sliding indentation with lateral compression | Depth-dependent COL fibril alignment           | –             | –                  | –                                   | Sliding indentation | –                                                                                                                                  |

|     | <b>Study goal</b>                                                                                       | <b>Zonal features</b>                               | <b>Matrix</b>      | <b>Fabrication</b>                                    | <b>Cells (origin)</b>  | <b>Stimulus</b>     | <b><i>In vitro</i></b>                                                                                                                             |
|-----|---------------------------------------------------------------------------------------------------------|-----------------------------------------------------|--------------------|-------------------------------------------------------|------------------------|---------------------|----------------------------------------------------------------------------------------------------------------------------------------------------|
| 416 | Evaluation of sliding indentation effect on the depth-dependent ECM deposition in engineered constructs | Biomimetic depth-dependent mechanical stimulus      | AGA                | TIC                                                   | Chondrocytes (bovine)  | Sliding indentation | 4 weeks with TGF- $\beta$ 3, 20 % O <sub>2</sub> and sliding indentation (10 % strain at 1 Hz) 4 hours per day and 5 days per week                 |
| 417 | Triggering SZ-like layer formation with moving point contact stimulation                                | SZ-like layer through moving point contact stimulus |                    |                                                       |                        |                     | 8 days with 5 days pre-culture and 3 days with dynamic moving point contact stimulus (3 mm amplitude at 0.5, 1 and 2 Hz) between 5 and 60 minutes  |
| 419 | Effect of DC with or without articular surface motion on ZCs' gene expression                           |                                                     |                    |                                                       |                        |                     | 10 days with 5 days of DC (10-20 % strain at 0.1 Hz) and ball oscillation ( $\pm$ 30 ° at 0.1 Hz) for 1 hour, twice a day                          |
| 420 | Effect of surface motion on the response of ZC                                                          | SZ-like surface motion and DC                       | PU, fibrin         | TIPS, freeze-drying and thrombin-induced crosslinking | Chondrocytes (bovine)  | DC and DS           | 8 days with DC and shear loading (10 % strain at 0.1 Hz and ball oscillation of 25 ° at 0.1 Hz) twice a day                                        |
| 421 | Modulation of chondrocyte-laden constructs' stiffness and friction using sliding surface motion         |                                                     |                    |                                                       |                        |                     | 4 weeks with 1 week pre-culture and 3 weeks DC (10-20 % strain at 1 Hz) and ball oscillation ( $\pm$ 25 ° at 1 Hz) 1 hour per day, 6 days per week |
| 422 | Effect of joint-mimicking loading conditions on zonal ECM synthesis and cartilage explant maturation    | Joint-mimicking mechanical stimulus                 | Cartilage explants | –                                                     | Chondrocytes (porcine) | DC and DS           | 4 weeks with DC and shear loading (0.25 to 0.3 MPa) for 1 hour daily                                                                               |

|     | <b>Study goal</b>                                                                                                                   | <b>Zonal features</b>                                                                           | <b>Matrix</b>       | <b>Fabrication</b>                | <b>Cells (origin)</b>  | <b>Stimulus</b>        | <b>In vitro</b>                                                                                                                                                                                         |
|-----|-------------------------------------------------------------------------------------------------------------------------------------|-------------------------------------------------------------------------------------------------|---------------------|-----------------------------------|------------------------|------------------------|---------------------------------------------------------------------------------------------------------------------------------------------------------------------------------------------------------|
| 423 | Influence of surface layer's friction on the chondrocyte phenotypic expression upon dynamic shear loading                           | Bilayered construct with cell-free top layer with SZ-like shear loading                         | PEGDA, ALG-MA       | UV photocrosslinking              | Chondrocytes (bovine)  | Intermittent DC and DS | 32 days with TGF- $\beta$ 3 and 3 weeks pre-culture followed by 11 days of intermittent dynamic shear loading (1 mm amplitude at 1 Hz with an offset compression of 15 %) for 1 hour daily              |
| 424 | Cartilage-on-chip system to assess the effect of different mechanical stimuli on chondrocyte phenotype and ECM production           | Zonal cell deformation and ECM synthesis induced by DC and multi-directional mechanical stimuli | AGA                 | TIC                               | Chondrocytes (human)   | DC and DS              | 15 days with TGF- $\beta$ 3 and DC loading (300 mbar at 1 Hz) and dynamic shear loading (-350 mbar at 0.33 Hz) 1 hour daily after day 1                                                                 |
| 426 | Effect of hydrodynamic stimulation in rotating bioreactor system on the evolution of surface zone features in engineered constructs | Biomimetic oscillatory shear stress on the surface of the construct                             | AGA                 | TIC                               | Chondrocytes (porcine) | Fluid-induced DS       | 2 weeks with 5 % O <sub>2</sub> and periodical agitation in a half-square wave (0–25 rpm) for 40 min (1 min on, 1 min off), followed by steady rotational speed (25 rpm) for the rest of the day, daily |
| 427 | Effect of perfused conditions on chondrocyte-laden hydrogels                                                                        | SZ-like shear stress by perfusion                                                               | ALG                 | Ionic crosslinking                | Chondrocytes (bovine)  | Fluid-induced DS       | 2 weeks with perfusion (3 mL                                                                                                                                                                            |
| 344 | Effect of depth-dependent fibre alignment of zonal constructs and DC or perfusion stimuli on ACPCs behaviour                        | Depth-dependent fibre alignment and DC stimulus and perfusion                                   | PCL, GEL, COL I, GO | Electrospinning and freeze-drying | ACPCs (bovine)         | DC or fluid-induced DS | 3 weeks with 5 days pre-culture and 16 days with DC loading (10 % strain at 0.5 Hz) for 2 hours daily or continuous perfusion (0.75 mL/min per scaffold)                                                |

|                             | <b>Study goal</b>                                                                                        | <b>Zonal features</b>                              | <b>Matrix</b>           | <b>Fabrication</b>            | <b>Cells (origin)</b>                         | <b>Stimulus</b> | <b><i>In vitro</i></b>                                                                           |
|-----------------------------|----------------------------------------------------------------------------------------------------------|----------------------------------------------------|-------------------------|-------------------------------|-----------------------------------------------|-----------------|--------------------------------------------------------------------------------------------------|
| 428                         | Influence of oscillatory tensile strain on the response of ZC                                            | ZC and dynamic tensile loading                     | Fibrin                  | Thrombin-induced crosslinking | Chondrocytes (rabbit)                         | Intermittent DT | 15 days, 3 of those with oscillatory tensile loading (10 % strain at 1 Hz) for 12 hours          |
| 429                         | Effect of DT loading on the expression of SZP                                                            | Tensile stimulus for SZ chondrocyte phenotype      | Laminin-coated surfaces |                               | Chondrocytes (porcine)                        | DT              | 48 hours with DT loading (7 and 21 % strain at 0.5 Hz) for 1 second, with another one of rest    |
| 430                         | Effect of excessive tensile load on gene expression and protein synthesis of ZC                          | ZC                                                 | COL II-coated surface   | Solvent casting               | Chondrocytes (rabbit)                         | DT              | 24 hours with DT loading (17 kPa at 30 cycles per minute) for 1 second, with another one of rest |
| 431                         | Sensitivity of ZC to pure hydrostatic pressure                                                           | ZC                                                 | COL I-coated surface    |                               | Chondrocytes (bovine)                         | HP              | 5 days of constant hydrostatic pressure (0.5 MPa)                                                |
| <i>Biochemical stimulus</i> |                                                                                                          |                                                    |                         |                               |                                               |                 |                                                                                                  |
| 434                         | Reproducing native physiological O <sub>2</sub> environment to reduce culture time of chondrocyte sheets | Physiological O <sub>2</sub> concentrations        | –                       | –                             | Chondrocytes and synoviocytes (human)         | O <sub>2</sub>  | 3 weeks with TGF-β1 and 2, 5 or 21 % O <sub>2</sub>                                              |
| 435                         | Effect of O <sub>2</sub> tension on ZC                                                                   | ZC and physiological O <sub>2</sub> concentrations | –                       | –                             | Chondrocytes (human)                          | O <sub>2</sub>  | 4 weeks with TGF-β3 and 5 or 20 % O <sub>2</sub>                                                 |
| 436                         | Evaluation of SPZ expression under different O <sub>2</sub> tensions                                     | ZC and physiological O <sub>2</sub> concentrations | Cartilage explants      | –                             | ATDC5 cells (mouse) and chondrocytes (bovine) | O <sub>2</sub>  | 4 days with TGF-β1 and 1, 5 or 21 % O <sub>2</sub>                                               |

|                                                          | <b>Study goal</b>                                                                                                                           | <b>Zonal features</b>                                 | <b>Matrix</b>      | <b>Fabrication</b> | <b>Cells (origin)</b> | <b>Stimulus</b>            | <b><i>In vitro</i></b>                                                                                          |
|----------------------------------------------------------|---------------------------------------------------------------------------------------------------------------------------------------------|-------------------------------------------------------|--------------------|--------------------|-----------------------|----------------------------|-----------------------------------------------------------------------------------------------------------------|
| 439                                                      | Mimicking the nutrients gradients for the generation of zonal constructs                                                                    | Glucose concentration gradient                        | AGA                | TIC                | Chondrocytes (bovine) | Glucose                    | 1 week with 2.5 and 20 % O <sub>2</sub> , in a bioreactor designed to create glucose gradients (0, 5 and 20 mM) |
| 440                                                      | Prediction of ZCs' O <sub>2</sub> consumption based on changes in the nutritional environment                                               | ZC and O <sub>2</sub> consumption behaviour           | –                  | –                  | Chondrocytes (bovine) | Glucose and O <sub>2</sub> | 12 hours with 0-22 mM glucose                                                                                   |
| 442                                                      | Measurement of zonal OP in cartilage explants                                                                                               | ZC and physiological OP                               | Cartilage explants | –                  | Chondrocytes (bovine) | OP                         | 30 min with low and high Osm (200 to 500 mOsm)                                                                  |
| 443                                                      | Effect of OP on ZCs' ECM synthesis                                                                                                          | ZC and physiological OP                               | –                  | –                  | Chondrocytes (bovine) | OP                         | 10 days with low and high Osm (310 and 450 ± 10 mOsm)                                                           |
| <i>Combination of mechanical and biochemical stimuli</i> |                                                                                                                                             |                                                       |                    |                    |                       |                            |                                                                                                                 |
| 444                                                      | Assessment of chondrocyte response to both DC loading and gradient nutrient supply                                                          | DC stimulus and glucose concentration gradient        | Cartilage explants | –                  | Chondrocytes (bovine) | DC and glucose             | 2 weeks with 0-25 mM glucose and DC loading (2.5 % strain at 0.33 Hz) for 1 hour three times a day              |
| 445                                                      | Effect of biomimetic depth-dependent mechanical stimulus and oxygen gradient on the depth-dependent ECM deposition in cell-laden constructs | DC stimulus and O <sub>2</sub> concentration gradient | AGA                | TIC                | BMMSCs (porcine)      | DC and O <sub>2</sub>      | 6 weeks with TGF-β3 and DC loading (10 % strain at 1 Hz) 4 hours per day and 5 days per week                    |
| 446                                                      | Effect of biomimetic depth-dependent mechanical stimulus and oxygen gradient on the depth-dependent ECM                                     |                                                       |                    |                    | FPMSCs (porcine)      |                            | 6 weeks with TGF-β3 and DC (10 % strain at 1 Hz) 2 hours per day and 5 days per week                            |

|     | <b>Study goal</b>                                                                                             | <b>Zonal features</b>                              | <b>Matrix</b>                  | <b>Fabrication</b>                    | <b>Cells (origin)</b> | <b>Stimulus</b>       | <b>In vitro</b>                                                                                         |
|-----|---------------------------------------------------------------------------------------------------------------|----------------------------------------------------|--------------------------------|---------------------------------------|-----------------------|-----------------------|---------------------------------------------------------------------------------------------------------|
|     | deposition in cell-laden constructs                                                                           |                                                    |                                |                                       |                       |                       |                                                                                                         |
| 447 | Effect of serial passaging on chondrocytes' PRG4 and COL 2 expression under different O <sub>2</sub> tensions | ZC and physiological O <sub>2</sub> concentrations | ALG beads<br>COL 1-coated PDMS | Ionic crosslinking<br>Solvent casting | Chondrocytes (bovine) | DT and O <sub>2</sub> | 4 days with TGF-β1 and 1 or 21 % O <sub>2</sub> and DT loading (5 % strain at 1 Hz) for 2 hours per day |

Osm, osmolarity; PVA-MA, poly(vinyl alcohol) methacryloyl.
